# Supplementary material
Source: ML conference proceedings conference paper supplement (https://aclanthology.org/2026.semeval-1.31)

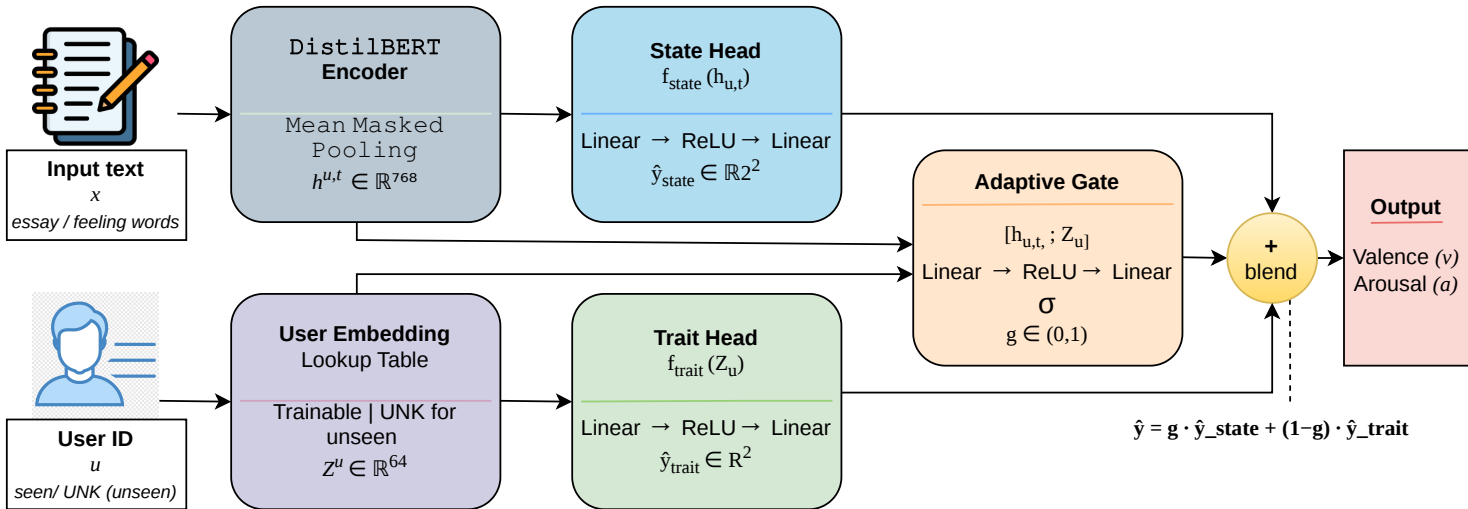

Supplement: SupplementaryMaterial [file Architecture_Diagram.drawio.pdf › latex/Figures/Architecture_Diagram.drawio.pdf]

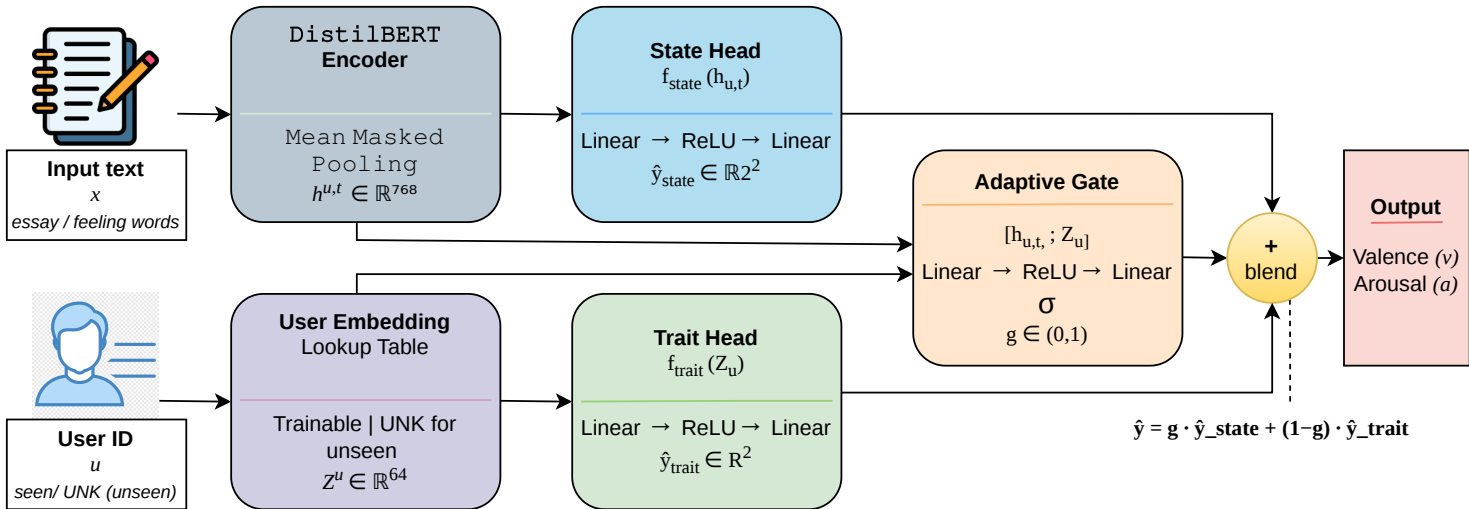

Supplement: SupplementaryMaterial [file Architecture_Diagram.pdf › latex/Figures/Architecture_Diagram.pdf]

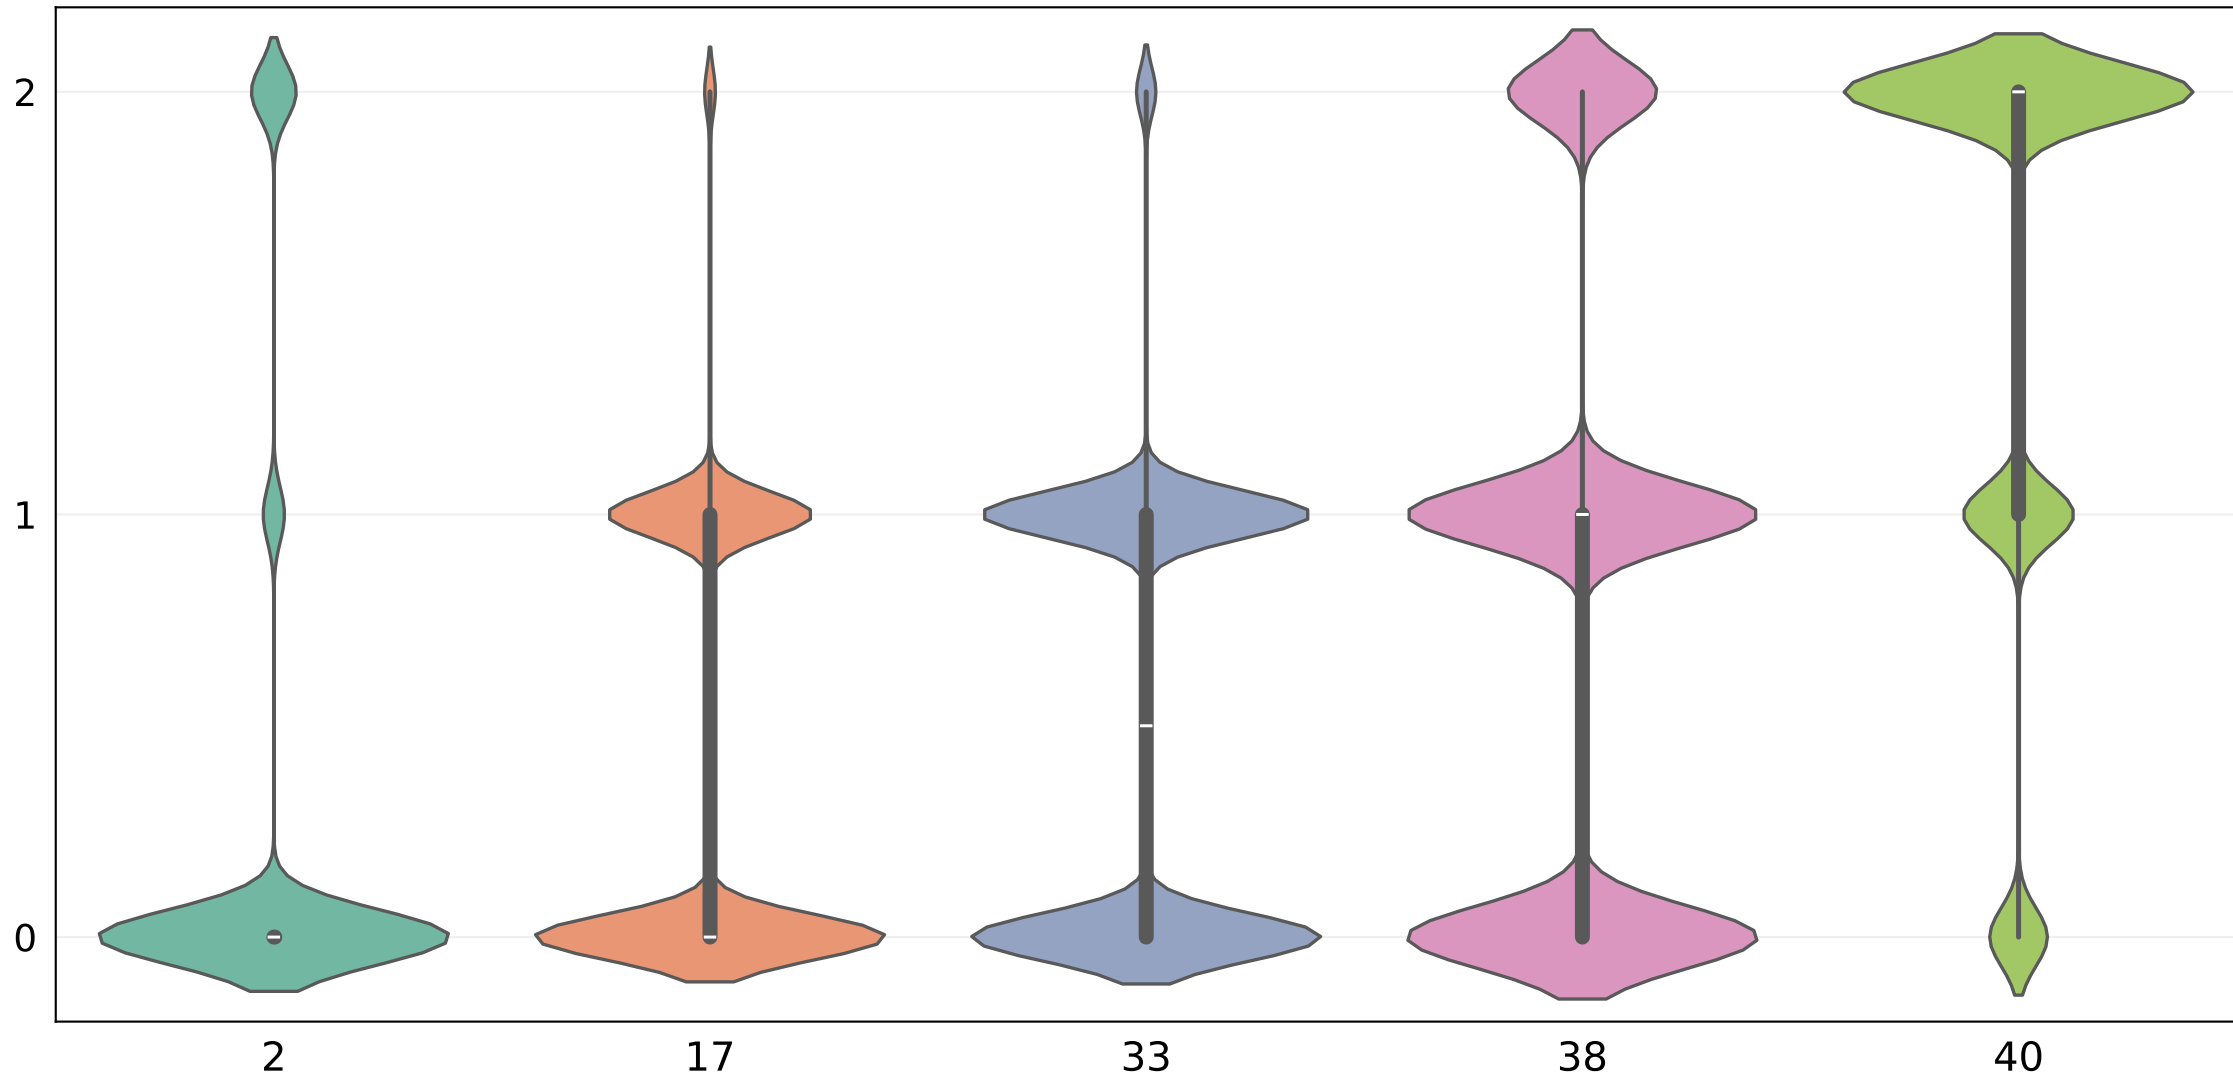

Supplement: SupplementaryMaterial [file arousal_violin.pdf › latex/Figures/arousal_violin.pdf]

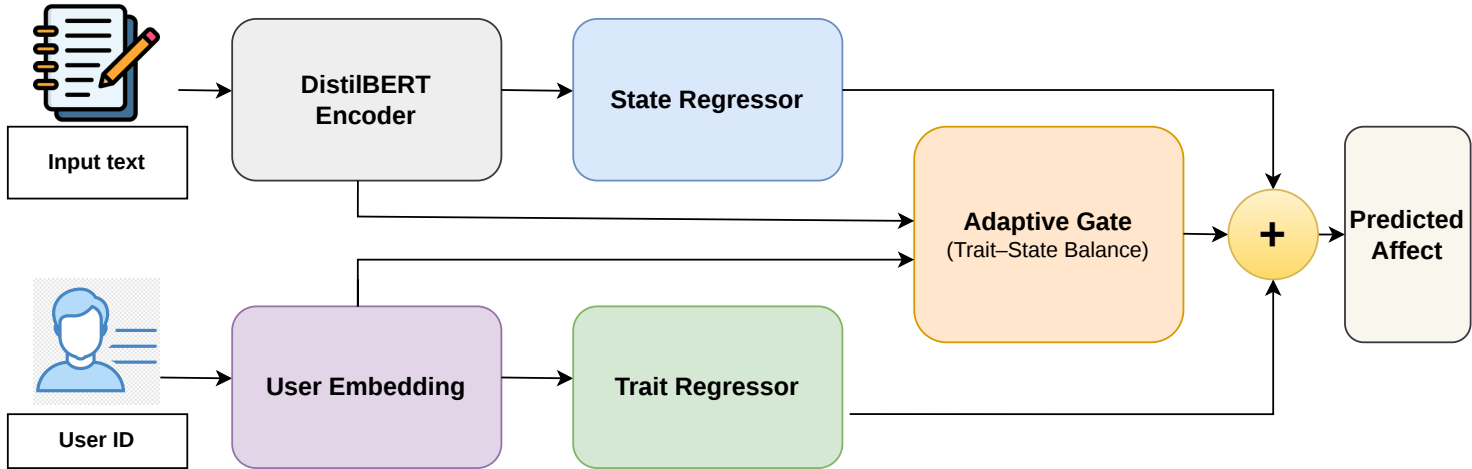

Supplement: SupplementaryMaterial [file diagram.drawio.pdf › latex/Figures/diagram.drawio.pdf]

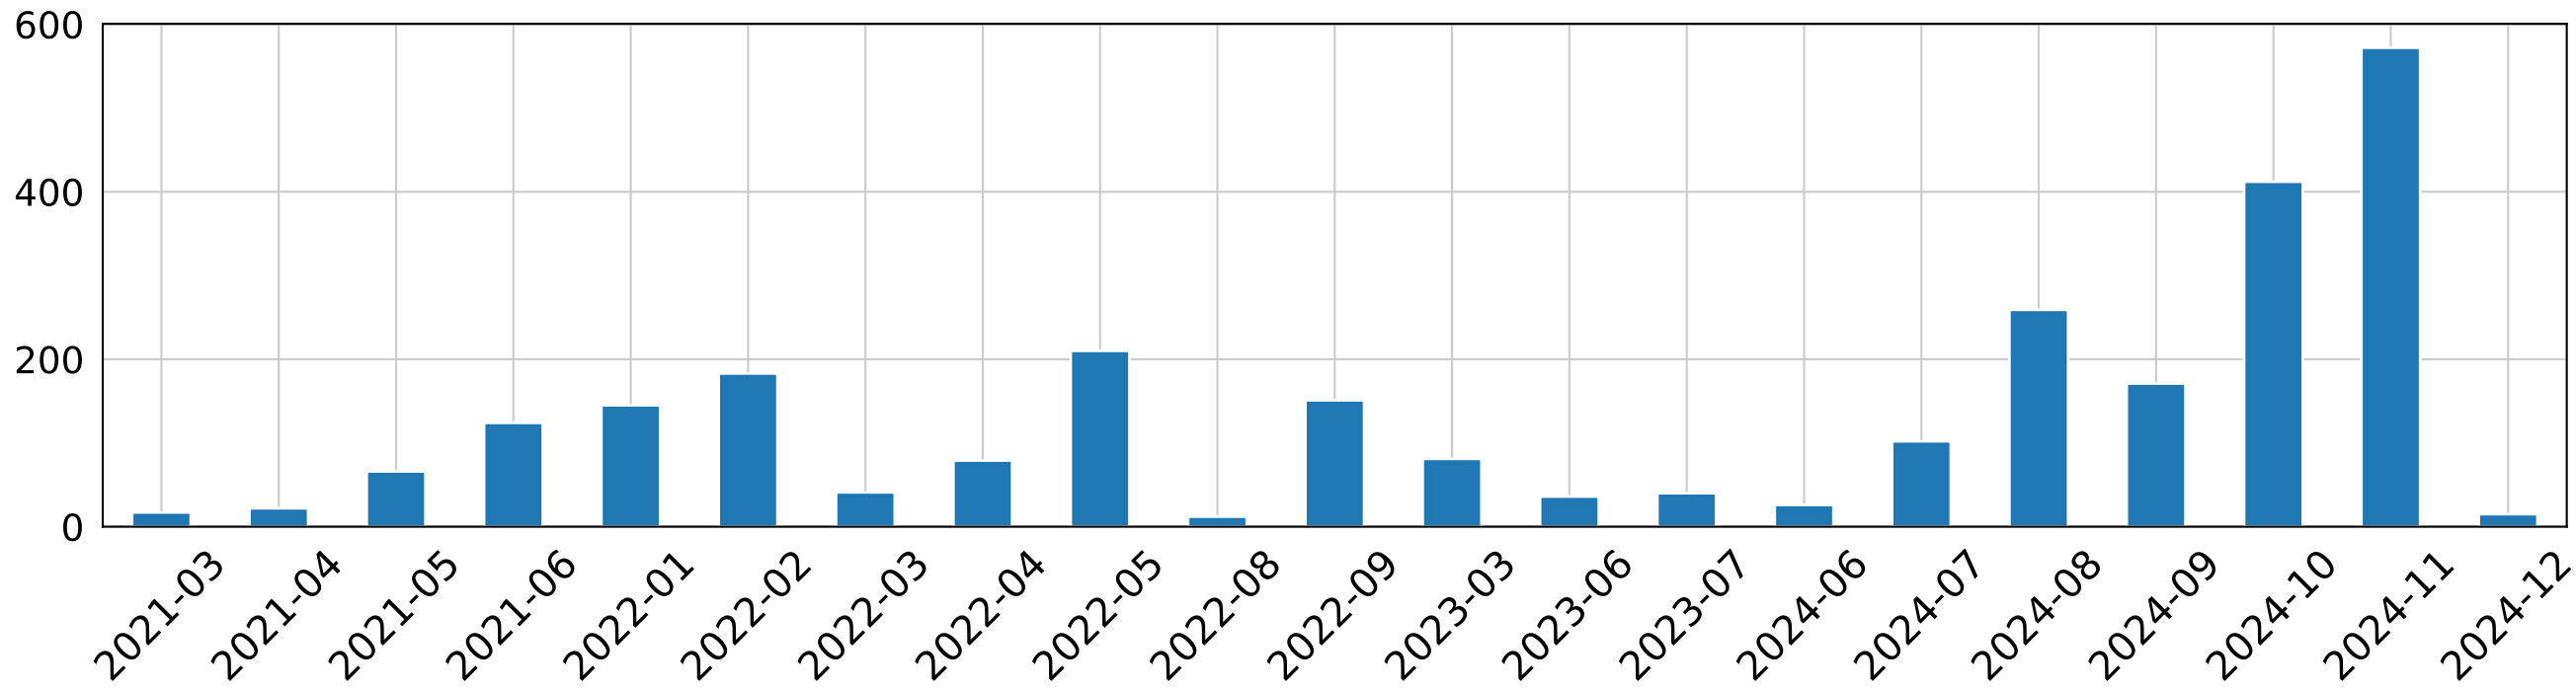

Supplement: SupplementaryMaterial [file monthly_activity.pdf › latex/Figures/monthly_activity.pdf]

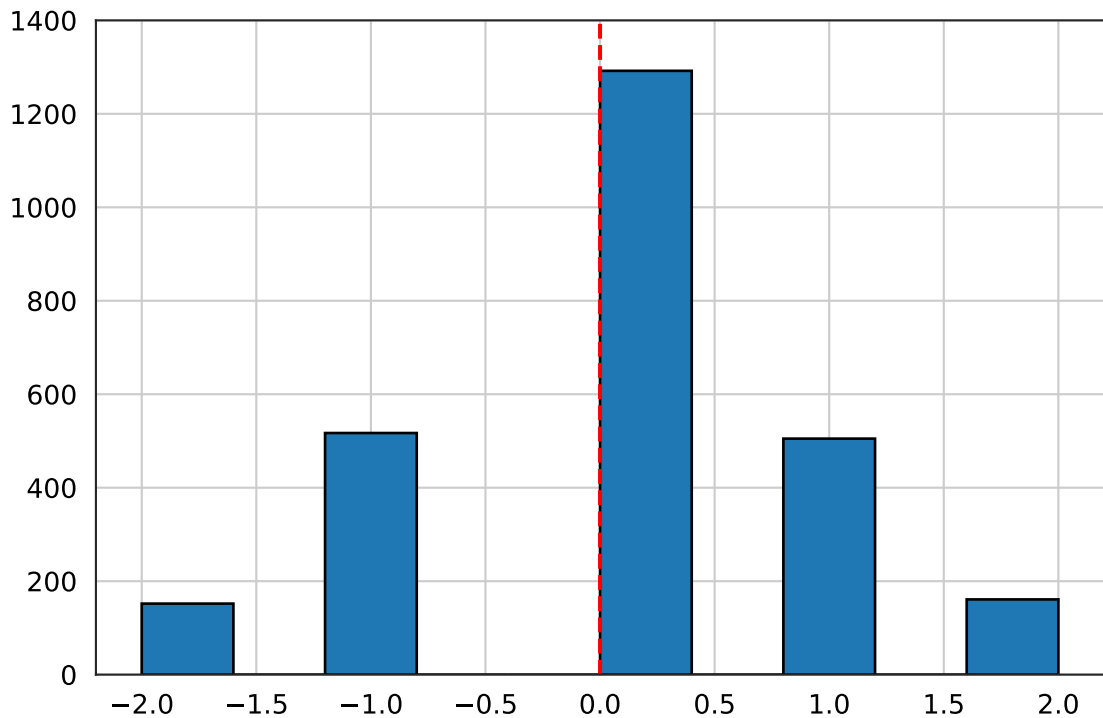

Supplement: SupplementaryMaterial [file statechange_arousal.pdf › latex/Figures/statechange_arousal.pdf]

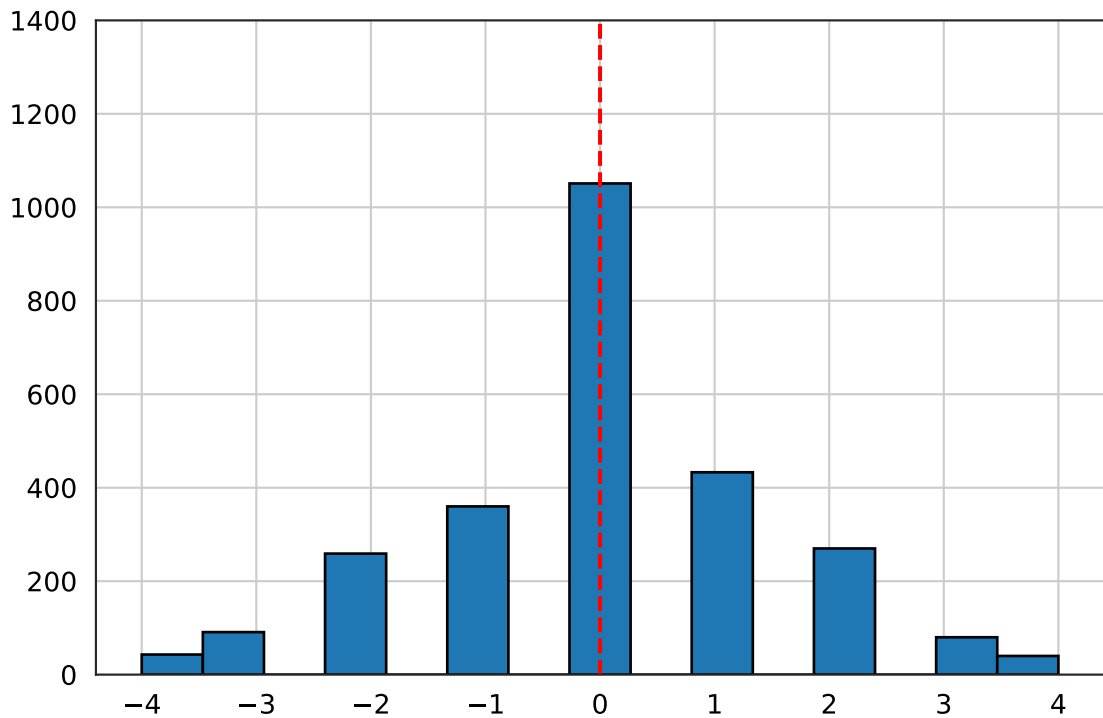

Supplement: SupplementaryMaterial [file statechange_valence.pdf › latex/Figures/statechange_valence.pdf]

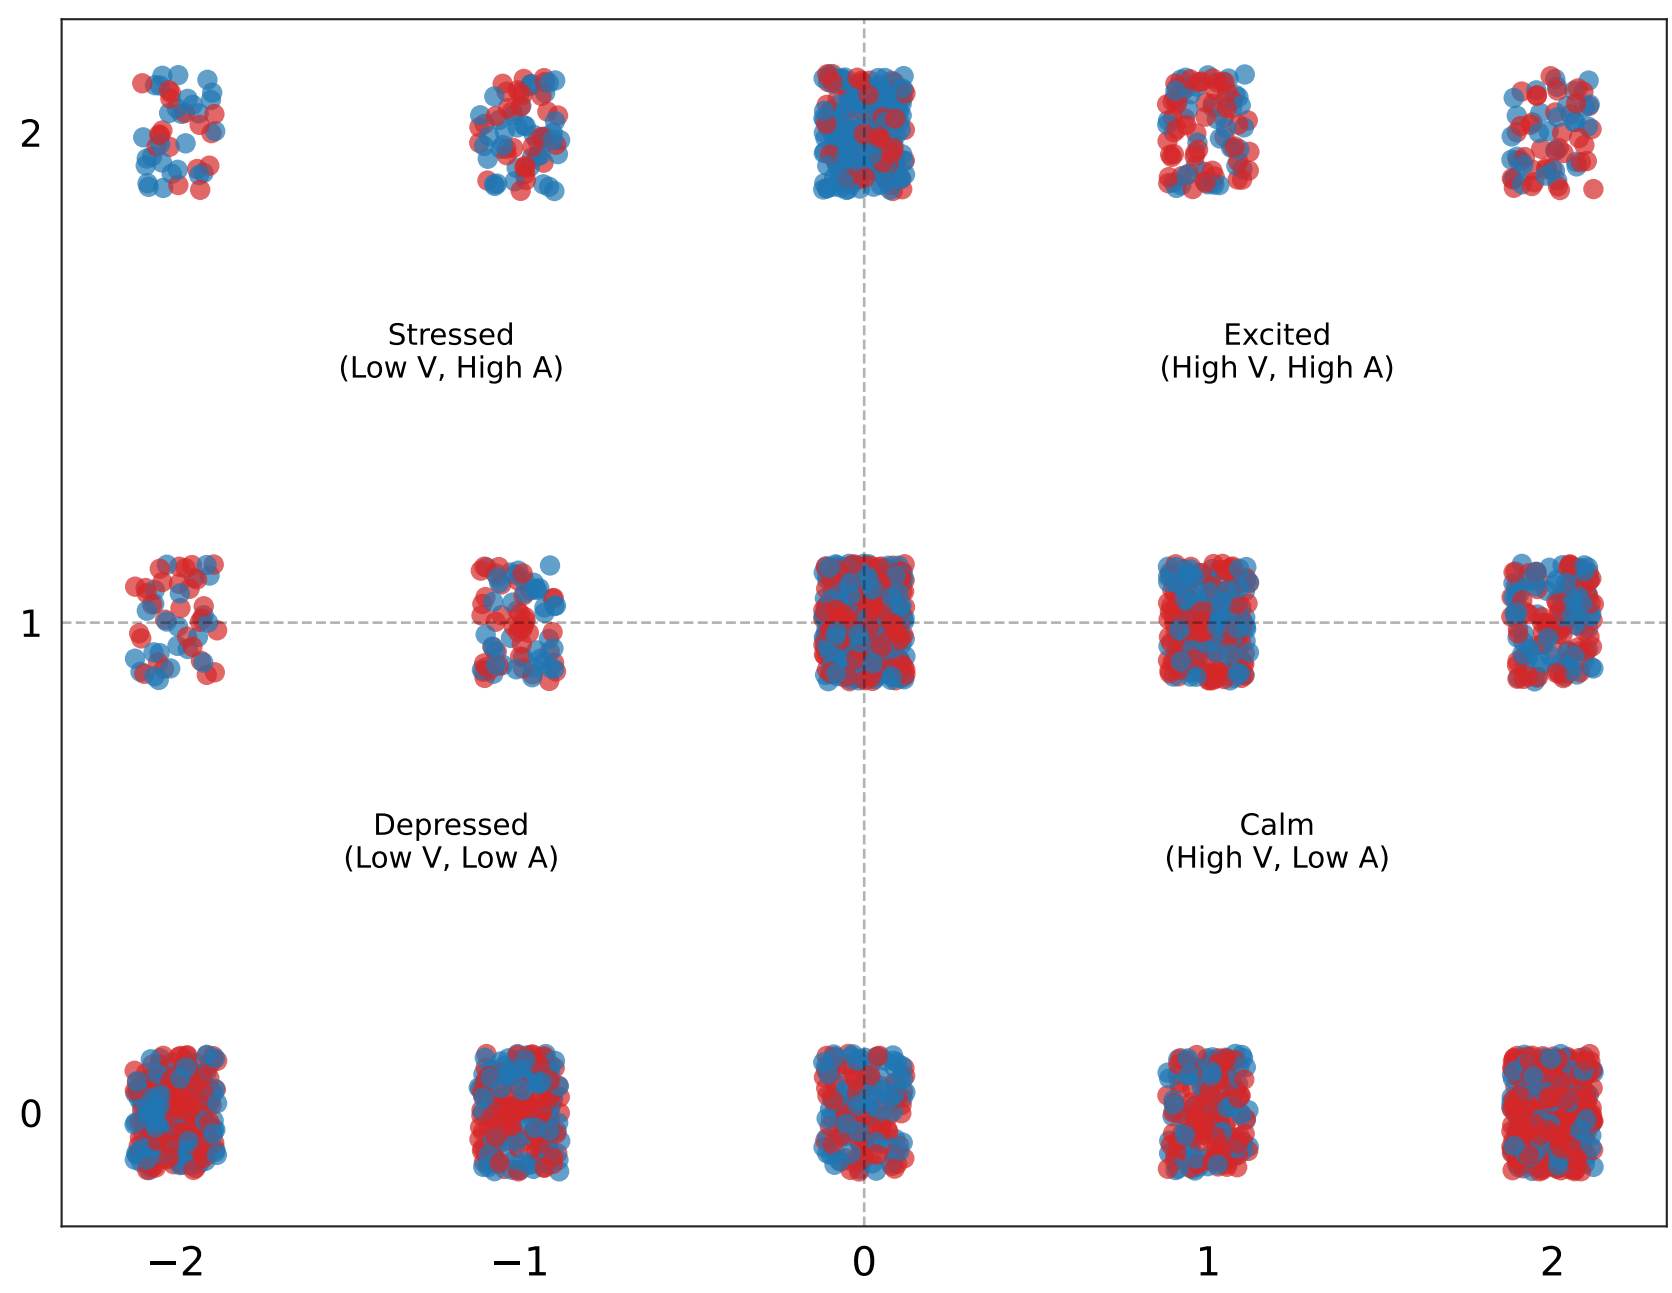

Supplement: SupplementaryMaterial [file va_scatter.pdf › latex/Figures/va_scatter.pdf]

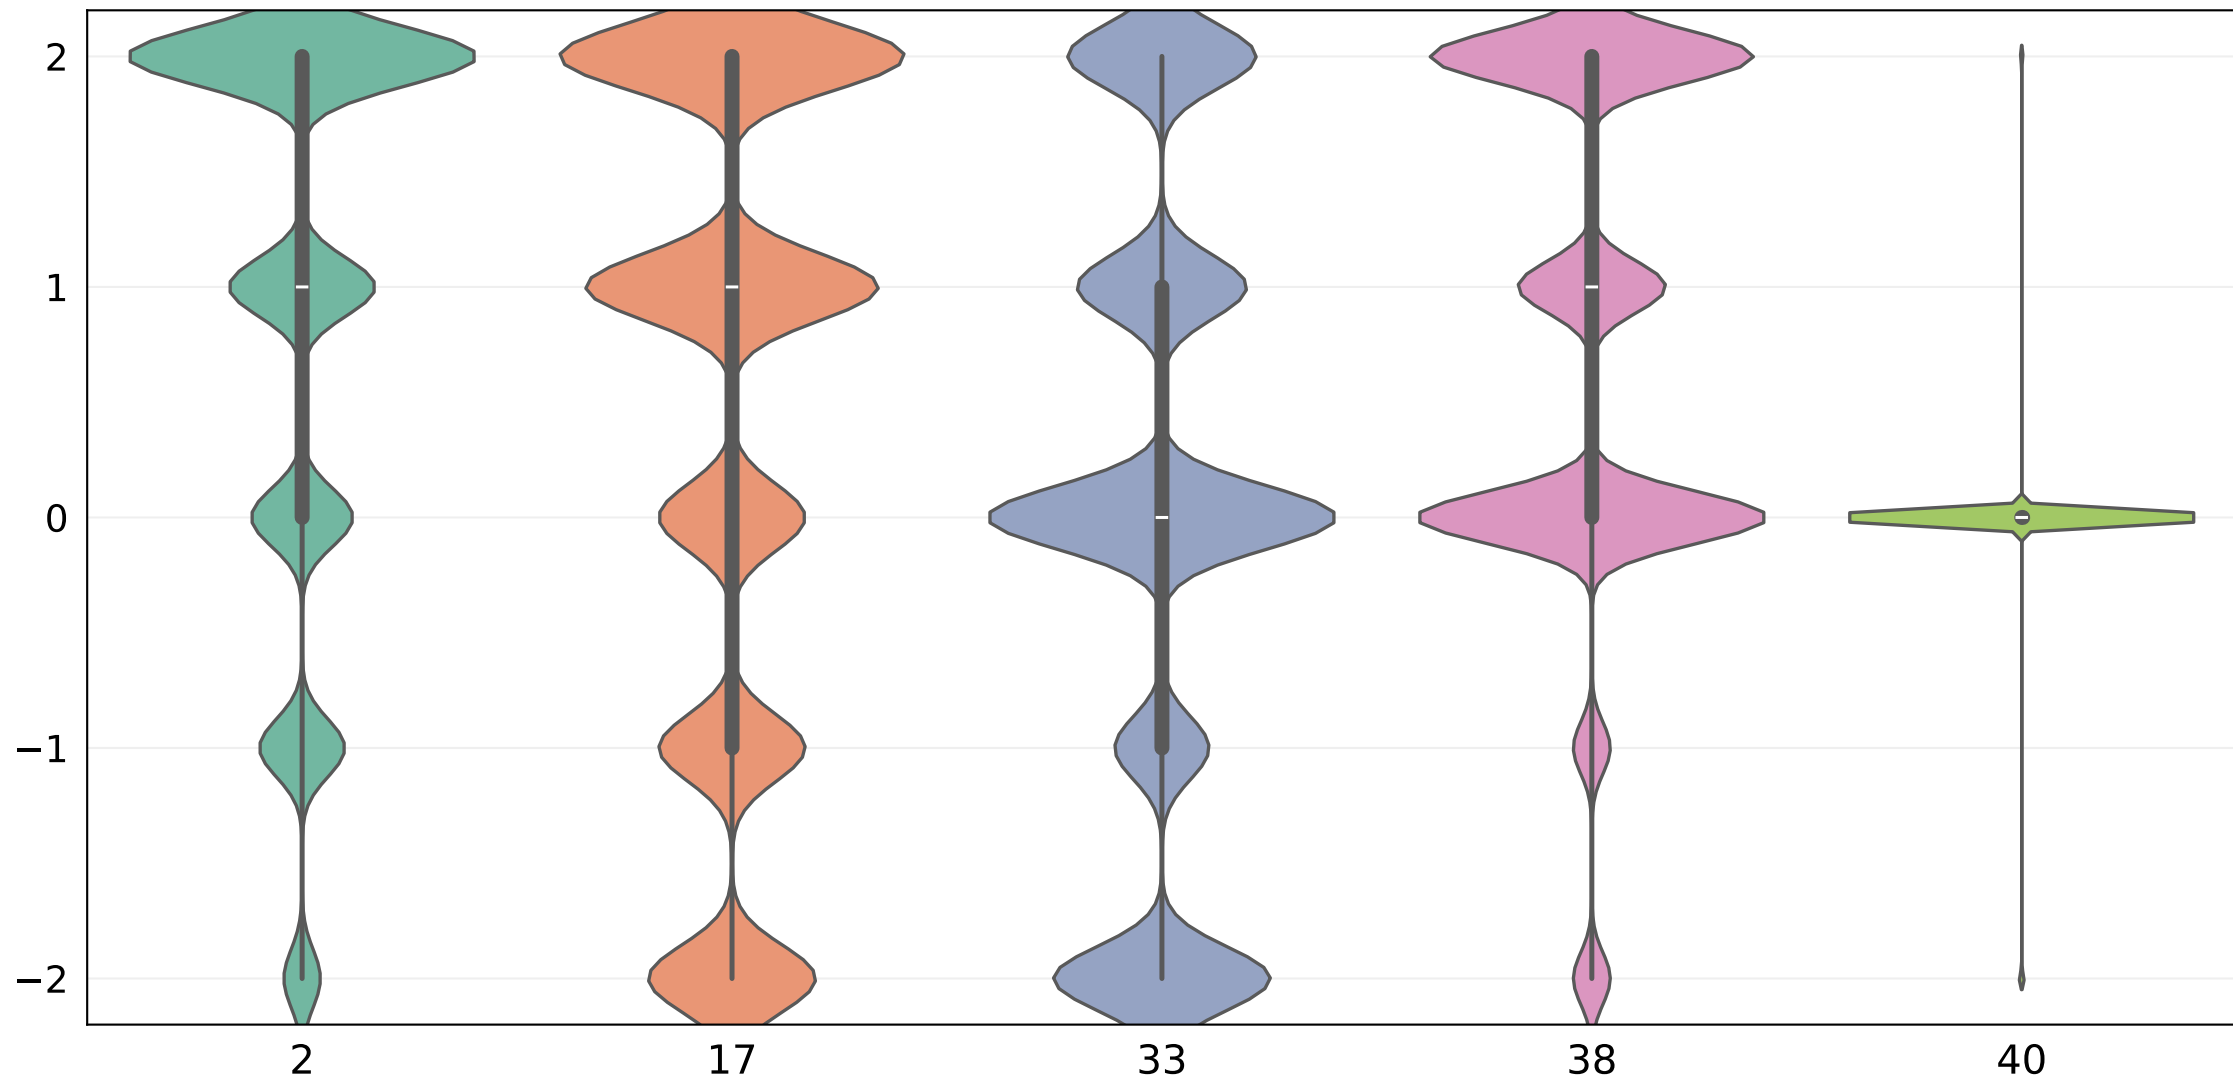

Supplement: SupplementaryMaterial [file valence_violin.pdf › latex/Figures/valence_violin.pdf]
